# Supplementary material
Source: publisher figshare collection journal article supplement (https://acs.figshare.com/ndownloader/files/3794449)
Supplement: Supplementary file 1 [file 3794449]

HEADER    ----                                    30-OCT-14   xxxx              
COMPND    ---                                                                   
REMARK   3
REMARK   3 REFINEMENT.
REMARK   3   PROGRAM     : REFMAC 5.8.0073  
REMARK   3   AUTHORS     : MURSHUDOV,SKUBAK,LEBEDEV,PANNU,
REMARK   3                 STEINER,NICHOLLS,WINN,LONG,VAGIN
REMARK   3
REMARK   3    REFINEMENT TARGET : MAXIMUM LIKELIHOOD
REMARK   3
REMARK   3  DATA USED IN REFINEMENT.
REMARK   3   RESOLUTION RANGE HIGH (ANGSTROMS) :   1.05
REMARK   3   RESOLUTION RANGE LOW  (ANGSTROMS) :  28.70
REMARK   3   DATA CUTOFF            (SIGMA(F)) : NONE
REMARK   3   COMPLETENESS FOR RANGE        (%) :  98.80
REMARK   3   NUMBER OF REFLECTIONS             :   15996
REMARK   3
REMARK   3  FIT TO DATA USED IN REFINEMENT.
REMARK   3   CROSS-VALIDATION METHOD          : THROUGHOUT
REMARK   3   FREE R VALUE TEST SET SELECTION  : RANDOM
REMARK   3   R VALUE     (WORKING + TEST SET) : 0.09628
REMARK   3   R VALUE            (WORKING SET) :  0.09582
REMARK   3   FREE R VALUE                     :  0.10497
REMARK   3   FREE R VALUE TEST SET SIZE   (%) :  5.0
REMARK   3   FREE R VALUE TEST SET COUNT      :   848
REMARK   3
REMARK   3  FIT IN THE HIGHEST RESOLUTION BIN.
REMARK   3   TOTAL NUMBER OF BINS USED           :      20
REMARK   3   BIN RESOLUTION RANGE HIGH           :    1.050
REMARK   3   BIN RESOLUTION RANGE LOW            :    1.077
REMARK   3   REFLECTION IN BIN     (WORKING SET) :     1148
REMARK   3   BIN COMPLETENESS (WORKING+TEST) (%) :    97.32
REMARK   3   BIN R VALUE           (WORKING SET) :    0.202
REMARK   3   BIN FREE R VALUE SET COUNT          :       51
REMARK   3   BIN FREE R VALUE                    :    0.251
REMARK   3
REMARK   3  NUMBER OF NON-HYDROGEN ATOMS USED IN REFINEMENT.
REMARK   3   ALL ATOMS                :      333
REMARK   3
REMARK   3  B VALUES.
REMARK   3   FROM WILSON PLOT           (A**2) : NULL
REMARK   3   MEAN B VALUE      (OVERALL, A**2) :  17.434
REMARK   3   OVERALL ANISOTROPIC B VALUE.
REMARK   3    B11 (A**2) :    -0.44
REMARK   3    B22 (A**2) :    -0.44
REMARK   3    B33 (A**2) :     0.88
REMARK   3    B12 (A**2) :     0.00
REMARK   3    B13 (A**2) :     0.00
REMARK   3    B23 (A**2) :    -0.00
REMARK   3
REMARK   3  ESTIMATED OVERALL COORDINATE ERROR.
REMARK   3   ESU BASED ON R VALUE                            (A):   0.016
REMARK   3   ESU BASED ON FREE R VALUE                       (A):   0.016
REMARK   3   ESU BASED ON MAXIMUM LIKELIHOOD                 (A):   0.013
REMARK   3   ESU FOR B VALUES BASED ON MAXIMUM LIKELIHOOD (A**2):   0.578
REMARK   3
REMARK   3 CORRELATION COEFFICIENTS.
REMARK   3   CORRELATION COEFFICIENT FO-FC      :   0.989
REMARK   3   CORRELATION COEFFICIENT FO-FC FREE :   0.988
REMARK   3
REMARK   3  RMS DEVIATIONS FROM IDEAL VALUES        COUNT    RMS    WEIGHT
REMARK   3   BOND LENGTHS REFINED ATOMS        (A):   291 ; 0.038 ; 0.013
REMARK   3   BOND LENGTHS OTHERS               (A):   137 ; 0.002 ; 0.020
REMARK   3   BOND ANGLES REFINED ATOMS   (DEGREES):   458 ; 2.815 ; 1.604
REMARK   3   BOND ANGLES OTHERS          (DEGREES):   313 ; 3.870 ; 3.000
REMARK   3   CHIRAL-CENTER RESTRAINTS       (A**3):    30 ; 0.093 ; 0.200
REMARK   3   GENERAL PLANES REFINED ATOMS      (A):   177 ; 0.040 ; 0.020
REMARK   3   GENERAL PLANES OTHERS             (A):    77 ; 0.009 ; 0.020
REMARK   3
REMARK   3  ISOTROPIC THERMAL FACTOR RESTRAINTS.     COUNT   RMS    WEIGHT
REMARK   3   SIDE-CHAIN BOND REFINED ATOMS  (A**2):   291 ; 2.336 ; 1.460
REMARK   3   SIDE-CHAIN BOND OTHER ATOMS  (A**2)  :   292 ; 2.333 ;******
REMARK   3   SIDE-CHAIN ANGLE OTHER ATOMS (A**2)  :   459 ; 2.888 ; 2.190
REMARK   3   LONG RANGE B REFINED ATOMS (A**2)    :   718 ; 4.290 ;17.113
REMARK   3   LONG RANGE B OTHER ATOMS (A**2)      :   676 ; 3.511 ;34.999
REMARK   3
REMARK   3 ANISOTROPIC THERMAL FACTOR RESTRAINTS.    COUNT   RMS   WEIGHT
REMARK   3   RIGID-BOND RESTRAINTS          (A**2):   291 ; 7.693 ; 3.000
REMARK   3   SPHERICITY; FREE ATOMS         (A**2):    14 ;38.435 ; 5.000
REMARK   3   SPHERICITY; BONDED ATOMS       (A**2):   319 ;14.662 ; 5.000
REMARK   3
REMARK   3  NCS RESTRAINTS STATISTICS
REMARK   3   NUMBER OF NCS GROUPS : NULL
REMARK   3
REMARK   3  TWIN DETAILS
REMARK   3   NUMBER OF TWIN DOMAINS  : NULL
REMARK   3
REMARK   3
REMARK   3  TLS DETAILS
REMARK   3   NUMBER OF TLS GROUPS  : NULL
REMARK   3
REMARK   3
REMARK   3  BULK SOLVENT MODELLING.
REMARK   3   METHOD USED :  MASK
REMARK   3   PARAMETERS FOR MASK CALCULATION
REMARK   3   VDW PROBE RADIUS   :   1.20
REMARK   3   ION PROBE RADIUS   :   0.80
REMARK   3   SHRINKAGE RADIUS   :   0.80
REMARK   3
REMARK   3  OTHER REFINEMENT REMARKS:
REMARK   3  HYDROGENS HAVE BEEN ADDED IN THE RIDING POSITIONS
REMARK   3  U VALUES      : REFINED INDIVIDUALLY
REMARK   3
CRYST1   42.160   42.160   39.170  90.00  90.00  90.00 P 43 21 2                
SCALE1      0.023719  0.000000  0.000000        0.00000                         
SCALE2     -0.000000  0.023719  0.000000        0.00000                         
SCALE3      0.000000 -0.000000  0.025530        0.00000                         
HETATM    1  H14 RKM A   1       6.253  28.970   5.787  1.00 26.33           H
HETATM    2  C14 RKM A   1       5.347  28.477   6.118  1.00 17.95           C
ANISOU    2  C14 RKM A   1     3067   1522   2231     86     11   -432       C
HETATM    3  C13 RKM A   1       5.058  27.195   5.703  1.00 15.47           C
ANISOU    3  C13 RKM A   1     2602   1510   1765    165   -222   -280       C
HETATM    4  N4  RKM A   1       5.915  26.526   4.940  1.00 14.18           N
ANISOU    4  N4  RKM A   1     2392   1465   1528     -5   -210    -74       N
HETATM    5  C7  RKM A   1       5.590  25.265   4.550  1.00 12.43           C
ANISOU    5  C7  RKM A   1     2011   1421   1290      9   -149    -77       C
HETATM    6  C8  RKM A   1       6.470  24.527   3.720  1.00 11.49           C
ANISOU    6  C8  RKM A   1     1835   1409   1121     26   -283     13       C
HETATM    7  C9  RKM A   1       7.681  25.062   3.270  1.00 12.42           C
ANISOU    7  C9  RKM A   1     2025   1384   1309    -61   -367    -31       C
HETATM    8  H9  RKM A   1       7.979  26.072   3.522  1.00 14.09           H
HETATM    9  C11 RKM A   1       8.478  24.284   2.444  1.00 11.84           C
ANISOU    9  C11 RKM A   1     1874   1247   1377   -155   -235    213       C
HETATM   10  H11 RKM A   1       9.417  24.685   2.086  1.00 14.09           H
HETATM   11  C12 RKM A   1       8.098  23.020   2.069  1.00 11.57           C
ANISOU   11  C12 RKM A   1     1637   1389   1370    -98   -162    153       C
HETATM   12  H12 RKM A   1       8.773  22.431   1.462  1.00 14.09           H
HETATM   13  C10 RKM A   1       6.128  23.214   3.332  1.00 10.70           C
ANISOU   13  C10 RKM A   1     1749   1297   1020    -42   -347     21       C
HETATM   14  N1  RKM A   1       6.904  22.491   2.445  1.00 10.68           N
ANISOU   14  N1  RKM A   1     1756   1200   1100    -33      8    119       N
HETATM   15  C18 RKM A   1       4.453  29.132   6.933  1.00 20.04           C
ANISOU   15  C18 RKM A   1     3554   1648   2412    164   -170   -863       C
HETATM   16  H18 RKM A   1       4.675  30.154   7.214  1.00 26.34           H
HETATM   17  C17 RKM A   1       3.234  28.593   7.332  1.00 19.67           C
ANISOU   17  C17 RKM A   1     3165   2005   2302    331   -311   -667       C
HETATM   18  C16 RKM A   1       2.905  27.327   6.947  1.00 18.15           C
ANISOU   18  C16 RKM A   1     3363   1668   1864    669   -126   -462       C
HETATM   19  H16 RKM A   1       1.993  26.858   7.296  1.00 26.79           H
HETATM   20  C15 RKM A   1       3.803  26.630   6.135  1.00 14.88           C
ANISOU   20  C15 RKM A   1     2515   1620   1518    252   -377   -348       C
HETATM   21  N3  RKM A   1       3.491  25.381   5.718  1.00 13.64           N
ANISOU   21  N3  RKM A   1     2162   1709   1309    358   -192    -79       N
HETATM   22  C6  RKM A   1       4.343  24.691   4.959  1.00 12.42           C
ANISOU   22  C6  RKM A   1     2033   1560   1125    294   -101    -14       C
HETATM   23  C5  RKM A   1       4.006  23.330   4.554  1.00 11.54           C
ANISOU   23  C5  RKM A   1     1697   1416   1269    156   -158     20       C
HETATM   24  C1  RKM A   1       4.908  22.634   3.749  1.00 10.66           C
ANISOU   24  C1  RKM A   1     1583   1447   1019    106   -173     57       C
HETATM   25  C4  RKM A   1       2.841  22.688   4.938  1.00 12.97           C
ANISOU   25  C4  RKM A   1     1735   1702   1489    129    -62    -76       C
HETATM   26  H4  RKM A   1       2.132  23.178   5.594  1.00 12.25           H
HETATM   27  C3  RKM A   1       2.606  21.377   4.523  1.00 12.56           C
ANISOU   27  C3  RKM A   1     1618   1594   1559     78     91    -43       C
HETATM   28  H3  RKM A   1       1.702  20.859   4.818  1.00 12.25           H
HETATM   29  C2  RKM A   1       3.554  20.743   3.757  1.00 10.86           C
ANISOU   29  C2  RKM A   1     1474   1530   1119     97    -12     59       C
HETATM   30  H2  RKM A   1       3.333  19.749   3.393  1.00 12.25           H
HETATM   31  N2  RKM A   1       4.735  21.307   3.390  1.00 10.33           N
ANISOU   31  N2  RKM A   1     1504   1210   1210     69    -17    -17       N
HETATM   32 RU   RKM A   1       6.202  20.590   2.170  1.00 10.37          RU
ANISOU   32 RU   RKM A   1     1533   1225   1182    -50    -81     60      RU
HETATM   33  N12 RKM A   1       5.520  18.650   2.117  1.00 10.22           N
ANISOU   33  N12 RKM A   1     1577   1113   1191     54    101     81       N
HETATM   34  C36 RKM A   1       6.120  17.864   3.092  1.00  9.70           C
ANISOU   34  C36 RKM A   1     1215   1331   1140    -14    176     65       C
HETATM   35  C38 RKM A   1       4.632  18.026   1.383  1.00 10.27           C
ANISOU   35  C38 RKM A   1     1481   1204   1216    -61    -83    -88       C
HETATM   36  H38 RKM A   1       4.138  18.567   0.587  1.00 10.53           H
HETATM   37  N5  RKM A   1       5.227  21.138   0.514  1.00 11.57           N
ANISOU   37  N5  RKM A   1     1754   1274   1365    -71   -219     78       N
HETATM   38  C20 RKM A   1       3.988  21.508   0.190  1.00 13.52           C
ANISOU   38  C20 RKM A   1     2068   1468   1597     32   -568   -148       C
HETATM   39  H20 RKM A   1       3.323  21.751   1.009  1.00 13.76           H
HETATM   40  C21 RKM A   1       3.558  21.838  -1.110  1.00 14.52           C
ANISOU   40  C21 RKM A   1     2193   1606   1714    142   -417     -3       C
HETATM   41  H21 RKM A   1       2.578  22.278  -1.238  1.00 13.77           H
HETATM   42  N6  RKM A   1       4.316  21.677  -2.168  1.00 14.53           N
ANISOU   42  N6  RKM A   1     2409   1492   1617     78   -345     10       N
HETATM   43  C19 RKM A   1       5.976  20.904  -0.626  1.00 12.55           C
ANISOU   43  C19 RKM A   1     2224   1205   1336   -109   -361     56       C
HETATM   44  C22 RKM A   1       5.567  21.238  -1.969  1.00 13.48           C
ANISOU   44  C22 RKM A   1     2418   1273   1432   -198    -45     42       C
HETATM   45  C23 RKM A   1       6.462  21.023  -3.036  1.00 15.01           C
ANISOU   45  C23 RKM A   1     2628   1485   1588   -478    -11    166       C
HETATM   46  H23 RKM A   1       6.116  21.205  -4.046  1.00 13.93           H
HETATM   47  C24 RKM A   1       7.707  20.498  -2.856  1.00 13.62           C
ANISOU   47  C24 RKM A   1     2478   1275   1422   -429    218      1       C
HETATM   48  H24 RKM A   1       8.355  20.305  -3.701  1.00 13.92           H
HETATM   49  C25 RKM A   1       8.105  20.149  -1.554  1.00 12.82           C
ANISOU   49  C25 RKM A   1     2089   1321   1460   -373     23     81       C
HETATM   50  N7  RKM A   1       9.362  19.622  -1.357  1.00 13.67           N
ANISOU   50  N7  RKM A   1     1983   1501   1707   -354    240    -39       N
HETATM   51  C27 RKM A   1       9.738  19.358  -0.106  1.00 12.51           C
ANISOU   51  C27 RKM A   1     1839   1252   1661   -241    120    125       C
HETATM   52  H27 RKM A   1      10.736  18.986   0.088  1.00 11.93           H
HETATM   53  C28 RKM A   1       8.873  19.626   0.983  1.00 11.50           C
ANISOU   53  C28 RKM A   1     1640   1340   1387   -193    211     49       C
HETATM   54  H28 RKM A   1       9.214  19.375   1.977  1.00 11.92           H
HETATM   55  C26 RKM A   1       7.266  20.403  -0.428  1.00 11.88           C
ANISOU   55  C26 RKM A   1     2001   1197   1315   -244    229    -54       C
HETATM   56  N8  RKM A   1       7.646  20.062   0.856  1.00 10.91           N
ANISOU   56  N8  RKM A   1     1746   1177   1219   -158    -66     70       N
HETATM   57  N9  RKM A   1       7.235  19.884   3.759  1.00  9.99           N
ANISOU   57  N9  RKM A   1     1431   1182   1180   -130    -53    129       N
HETATM   58  C29 RKM A   1       7.049  18.523   3.939  1.00  9.45           C
ANISOU   58  C29 RKM A   1     1215   1465    911     28    140      0       C
HETATM   59  C30 RKM A   1       8.135  20.433   4.556  1.00 10.72           C
ANISOU   59  C30 RKM A   1     1437   1355   1279     21    -21     28       C
HETATM   60  H30 RKM A   1       8.340  21.486   4.439  1.00 10.83           H
HETATM   61  C31 RKM A   1       8.786  19.733   5.579  1.00 10.77           C
ANISOU   61  C31 RKM A   1     1359   1455   1275      9     69    151       C
HETATM   62  H31 RKM A   1       9.507  20.268   6.181  1.00 10.83           H
HETATM   63  N10 RKM A   1       8.616  18.427   5.797  1.00 10.64           N
ANISOU   63  N10 RKM A   1     1188   1559   1292      0    -66    144       N
HETATM   64  C32 RKM A   1       7.736  17.815   4.975  1.00 10.18           C
ANISOU   64  C32 RKM A   1     1264   1442   1160     89    104    197       C
HETATM   65  C33 RKM A   1       7.482  16.423   5.085  1.00 10.31           C
ANISOU   65  C33 RKM A   1     1332   1382   1203     96     82    229       C
HETATM   66  H33 RKM A   1       7.960  15.850   5.870  1.00  9.98           H
HETATM   67  C34 RKM A   1       6.585  15.809   4.240  1.00 10.01           C
ANISOU   67  C34 RKM A   1     1366   1345   1091     50    210     64       C
HETATM   68  H34 RKM A   1       6.360  14.766   4.385  1.00  9.98           H
HETATM   69  C35 RKM A   1       5.864  16.517   3.254  1.00  9.68           C
ANISOU   69  C35 RKM A   1     1292   1297   1087     12    155    -61       C
HETATM   70  N11 RKM A   1       4.966  15.892   2.437  1.00 10.56           N
ANISOU   70  N11 RKM A   1     1350   1389   1274     16    206    -41       N
HETATM   71  C37 RKM A   1       4.381  16.653   1.537  1.00 10.99           C
ANISOU   71  C37 RKM A   1     1389   1389   1396     49     95   -115       C
HETATM   72  H37 RKM A   1       3.683  16.189   0.853  1.00 10.54           H
HETATM   73  C39 RKM A   1       2.243  29.320   8.265  1.00 28.79           C
ANISOU   73  C39 RKM A   1     5191   2973   2774    772   -124  -1014       C
HETATM   74  H39 RKM A   1       2.752  30.087   8.790  1.00 28.47           H
HETATM   75 H391 RKM A   1       1.462  29.745   7.688  1.00 28.47           H
HETATM   76 H392 RKM A   1       1.836  28.627   8.956  1.00 28.47           H
HETATM   77 BA   BA  A   1      11.045  28.058  -5.641  1.00 11.00          BA
ANISOU   77 BA   BA  A   1     1342   1421   1415    -58    -29    284      BA
HETATM  470 CL   CL  A   1       5.386  20.172   6.506  0.66 16.17          CL
ANISOU  470 CL   CL  A   1     2063   2055   2025   -120   -131    121      CL
ATOM     78  O5' DT  C   1      14.905  24.275   5.409  1.00 22.81           O
ANISOU   78  O5' DT  C   1     3253   2943   2470  -1079   -575    214       O
ATOM     79  C5' DT  C   1      15.008  22.944   4.963  1.00 18.86           C
ANISOU   79  C5' DT  C   1     2263   2694   2205   -331   -689    179       C
ATOM     80  H5' DT  C   1      15.116  22.266   5.813  1.00 18.03           H
ATOM     81 H5'' DT  C   1      15.875  22.829   4.309  1.00 18.03           H
ATOM     82  C4' DT  C   1      13.749  22.643   4.215  1.00 15.09           C
ANISOU   82  C4' DT  C   1     1941   2202   1589   -199   -336    254       C
ATOM     83  H4' DT  C   1      13.745  23.687   4.546  1.00 14.10           H
ATOM     84  C3' DT  C   1      13.517  23.483   2.965  1.00 14.49           C
ANISOU   84  C3' DT  C   1     1647   2237   1621   -235   -234    365       C
ATOM     85  H3' DT  C   1      13.788  24.534   3.145  1.00 14.10           H
ATOM     86  O3' DT  C   1      14.292  22.979   1.881  1.00 15.34           O
ANISOU   86  O3' DT  C   1     1619   2217   1993   -225   -314    297       O
ATOM     87  C2' DT  C   1      12.022  23.389   2.741  1.00 14.77           C
ANISOU   87  C2' DT  C   1     1671   2101   1841    -70   -245    251       C
ATOM     88  H2' DT  C   1      11.779  22.531   2.112  1.00 14.10           H
ATOM     89 H2'' DT  C   1      11.636  24.297   2.274  1.00 14.10           H
ATOM     90  C1' DT  C   1      11.476  23.187   4.158  1.00 15.12           C
ANISOU   90  C1' DT  C   1     1685   2349   1712   -112   -288    358       C
ATOM     91  H1' DT  C   1      10.774  22.343   4.105  1.00 14.95           H
ATOM     92  O4' DT  C   1      12.564  22.822   5.009  1.00 17.19           O
ANISOU   92  O4' DT  C   1     1890   2690   1950   -194   -167    344       O
ATOM     93  N1  DT  C   1      10.818  24.346   4.784  1.00 15.24           N
ANISOU   93  N1  DT  C   1     1919   1798   2072   -367   -168     85       N
ATOM     94  C6  DT  C   1      11.288  25.627   4.583  1.00 18.78           C
ANISOU   94  C6  DT  C   1     2230   2116   2788   -478    -57     56       C
ATOM     95  H6  DT  C   1      12.126  25.776   3.922  1.00 14.10           H
ATOM     96  C5  DT  C   1      10.762  26.709   5.162  1.00 19.53           C
ANISOU   96  C5  DT  C   1     2555   1716   3150   -526    -92     29       C
ATOM     97  C7  DT  C   1      11.237  28.100   4.885  1.00 26.76           C
ANISOU   97  C7  DT  C   1     3095   2226   4846   -695    738    322       C
ATOM     98  H73 DT  C   1      11.653  28.144   3.914  1.00 24.83           H
ATOM     99  H72 DT  C   1      11.973  28.369   5.598  1.00 24.83           H
ATOM    100  H71 DT  C   1      10.425  28.777   4.945  1.00 24.83           H
ATOM    101  C4  DT  C   1       9.640  26.530   6.046  1.00 18.05           C
ANISOU  101  C4  DT  C   1     2454   1985   2416   -386   -156    -46       C
ATOM    102  N3  DT  C   1       9.241  25.223   6.231  1.00 15.43           N
ANISOU  102  N3  DT  C   1     2218   1719   1925   -485   -191    -21       N
ATOM    103  H3  DT  C   1       8.414  25.073   6.838  1.00 14.97           H
ATOM    104  C2  DT  C   1       9.753  24.109   5.610  1.00 13.98           C
ANISOU  104  C2  DT  C   1     1817   1950   1544   -254   -217    -22       C
ATOM    105  O2  DT  C   1       9.292  23.016   5.793  1.00 13.45           O
ANISOU  105  O2  DT  C   1     1865   1692   1551   -346   -192    102       O
ATOM    106  O4  DT  C   1       9.062  27.436   6.637  1.00 21.78           O
ANISOU  106  O4  DT  C   1     3212   1797   3265   -596    205   -376       O
ATOM    107 HO5' DT  C   1      15.669  24.885   5.310  1.00 14.11           H
ATOM    108  P   DC  C   2      14.420  23.695   0.484  1.00 15.37           P
ANISOU  108  P   DC  C   2     1922   2111   1805   -385   -223    291       P
ATOM    109  OP1 DC  C   2      15.551  23.022  -0.195  1.00 17.68           O
ANISOU  109  OP1 DC  C   2     1892   2779   2046   -390   -111    186       O
ATOM    110  O5' DC  C   2      13.073  23.382  -0.276  1.00 14.29           O
ANISOU  110  O5' DC  C   2     1882   1777   1770   -315   -422    366       O
ATOM    111  C5' DC  C   2      12.770  22.012  -0.622  1.00 13.42           C
ANISOU  111  C5' DC  C   2     1815   1580   1701   -247   -234    430       C
ATOM    112  H5' DC  C   2      12.617  21.415   0.279  1.00 14.09           H
ATOM    113 H5'' DC  C   2      13.587  21.574  -1.199  1.00 14.09           H
ATOM    114  C4' DC  C   2      11.519  22.045  -1.444  1.00 12.51           C
ANISOU  114  C4' DC  C   2     1642   1549   1560    -21   -256    384       C
ATOM    115  H4' DC  C   2      11.282  21.011  -1.721  1.00 12.48           H
ATOM    116  C3' DC  C   2      11.603  22.855  -2.729  1.00 11.69           C
ANISOU  116  C3' DC  C   2     1674   1554   1211    -37   -111    172       C
ATOM    117  H3' DC  C   2      12.295  23.698  -2.604  1.00 13.98           H
ATOM    118  O3' DC  C   2      12.081  21.951  -3.742  1.00 12.60           O
ANISOU  118  O3' DC  C   2     1766   1512   1510    174   -130    211       O
ATOM    119  C2' DC  C   2      10.203  23.376  -2.956  1.00 11.86           C
ANISOU  119  C2' DC  C   2     1752   1362   1393     18    -13    204       C
ATOM    120  H2' DC  C   2       9.665  22.740  -3.660  1.00 12.15           H
ATOM    121 H2'' DC  C   2      10.242  24.394  -3.342  1.00 12.15           H
ATOM    122  C1' DC  C   2       9.540  23.345  -1.587  1.00 11.66           C
ANISOU  122  C1' DC  C   2     1726   1451   1253    -79   -221     82       C
ATOM    123  H1' DC  C   2       8.587  22.813  -1.678  1.00 11.67           H
ATOM    124  O4' DC  C   2      10.426  22.619  -0.716  1.00 12.43           O
ANISOU  124  O4' DC  C   2     1881   1545   1296    -80   -161    354       O
ATOM    125  N1  DC  C   2       9.346  24.667  -0.973  1.00 11.77           N
ANISOU  125  N1  DC  C   2     1811   1323   1337   -170   -137    129       N
ATOM    126  C6  DC  C   2      10.402  25.508  -0.783  1.00 12.54           C
ANISOU  126  C6  DC  C   2     1805   1582   1378   -200    -99    183       C
ATOM    127  H6  DC  C   2      11.392  25.201  -1.090  1.00 13.98           H
ATOM    128  C5  DC  C   2      10.250  26.687  -0.146  1.00 13.93           C
ANISOU  128  C5  DC  C   2     1844   1541   1908   -266     29    -53       C
ATOM    129  H5  DC  C   2      11.094  27.341   0.027  1.00 13.99           H
ATOM    130  C4  DC  C   2       8.943  27.019   0.311  1.00 12.27           C
ANISOU  130  C4  DC  C   2     1877   1365   1419    -65   -217    157       C
ATOM    131  N4  DC  C   2       8.729  28.172   0.920  1.00 14.24           N
ANISOU  131  N4  DC  C   2     1929   1489   1992   -204   -277   -115       N
ATOM    132  H42 DC  C   2       9.496  28.812   1.070  1.00 13.99           H
ATOM    133  H41 DC  C   2       7.797  28.429   1.211  1.00 13.99           H
ATOM    134  N3  DC  C   2       7.890  26.225   0.083  1.00 11.92           N
ANISOU  134  N3  DC  C   2     1906   1252   1370   -201   -196    152       N
ATOM    135  C2  DC  C   2       8.072  25.018  -0.529  1.00 12.10           C
ANISOU  135  C2  DC  C   2     1982   1300   1317   -103   -287    335       C
ATOM    136  O2  DC  C   2       7.128  24.248  -0.751  1.00 11.81           O
ANISOU  136  O2  DC  C   2     1652   1255   1580   -126   -150    182       O
ATOM    137  OP2 DC  C   2      14.426  25.176   0.625  1.00 17.03           O
ANISOU  137  OP2 DC  C   2     2428   2195   1845   -642   -355    267       O
ATOM    138  P   DG  C   3      12.453  22.416  -5.212  1.00 12.41           P
ANISOU  138  P   DG  C   3     1608   1500   1606    192     -4    262       P
ATOM    139  OP1 DG  C   3      13.312  21.342  -5.749  1.00 14.10           O
ANISOU  139  OP1 DG  C   3     1670   1712   1975    323    -95    209       O
ATOM    140  O5' DG  C   3      11.083  22.443  -6.010  1.00 11.52           O
ANISOU  140  O5' DG  C   3     1524   1367   1485    153     65    178       O
ATOM    141  C5' DG  C   3      10.420  21.221  -6.332  1.00 11.65           C
ANISOU  141  C5' DG  C   3     1592   1327   1505    168     87     16       C
ATOM    142  H5' DG  C   3      10.396  20.568  -5.457  1.00 11.53           H
ATOM    143 H5'' DG  C   3      10.959  20.706  -7.130  1.00 11.53           H
ATOM    144  C4' DG  C   3       9.017  21.526  -6.782  1.00 10.92           C
ANISOU  144  C4' DG  C   3     1651   1415   1083    194    -25     81       C
ATOM    145  H4' DG  C   3       8.534  20.580  -7.065  1.00 10.85           H
ATOM    146  C3' DG  C   3       8.877  22.498  -7.938  1.00 11.61           C
ANISOU  146  C3' DG  C   3     1622   1667   1121    180    127    189       C
ATOM    147  H3' DG  C   3       9.696  23.230  -7.929  1.00 11.41           H
ATOM    148  O3' DG  C   3       8.861  21.742  -9.140  1.00 13.45           O
ANISOU  148  O3' DG  C   3     2367   1699   1043    462     75     67       O
ATOM    149  C2' DG  C   3       7.564  23.193  -7.655  1.00 11.17           C
ANISOU  149  C2' DG  C   3     1517   1740    987    180     36    156       C
ATOM    150  H2' DG  C   3       6.741  22.670  -8.144  1.00 12.16           H
ATOM    151 H2'' DG  C   3       7.590  24.227  -8.004  1.00 12.16           H
ATOM    152  C1' DG  C   3       7.413  23.137  -6.142  1.00 10.17           C
ANISOU  152  C1' DG  C   3     1605   1195   1061     49    -55     66       C
ATOM    153  H1' DG  C   3       6.376  22.857  -5.910  1.00 10.17           H
ATOM    154  O4' DG  C   3       8.307  22.107  -5.672  1.00 11.02           O
ANISOU  154  O4' DG  C   3     1676   1335   1173     56     11    133       O
ATOM    155  N9  DG  C   3       7.773  24.364  -5.434  1.00  9.98           N
ANISOU  155  N9  DG  C   3     1264   1321   1204    -15     17    111       N
ATOM    156  C4  DG  C   3       7.061  24.961  -4.426  1.00  9.69           C
ANISOU  156  C4  DG  C   3     1335   1267   1078     22    -49    137       C
ATOM    157  C5  DG  C   3       7.814  26.041  -4.035  1.00  9.88           C
ANISOU  157  C5  DG  C   3     1301   1238   1215     -6    -45    251       C
ATOM    158  N7  DG  C   3       8.968  26.133  -4.795  1.00 10.63           N
ANISOU  158  N7  DG  C   3     1383   1297   1356     -2     17    226       N
ATOM    159  C8  DG  C   3       8.913  25.101  -5.595  1.00 11.33           C
ANISOU  159  C8  DG  C   3     1404   1345   1556     56      9    180       C
ATOM    160  H8  DG  C   3       9.720  24.793  -6.243  1.00 11.41           H
ATOM    161  N3  DG  C   3       5.830  24.594  -3.995  1.00  9.61           N
ANISOU  161  N3  DG  C   3     1334   1310   1006     27     66     51       N
ATOM    162  C2  DG  C   3       5.344  25.416  -3.097  1.00  9.57           C
ANISOU  162  C2  DG  C   3     1397   1302    936     17      7    150       C
ATOM    163  N2  DG  C   3       4.116  25.231  -2.604  1.00 10.06           N
ANISOU  163  N2  DG  C   3     1380   1358   1081    -28     93    -46       N
ATOM    164  H22 DG  C   3       3.592  24.410  -2.871  1.00 10.00           H
ATOM    165  H21 DG  C   3       3.770  25.819  -1.860  1.00 10.00           H
ATOM    166  N1  DG  C   3       6.025  26.509  -2.609  1.00 10.19           N
ANISOU  166  N1  DG  C   3     1448   1318   1106      1      1    141       N
ATOM    167  H1  DG  C   3       5.557  27.103  -1.897  1.00 10.00           H
ATOM    168  C6  DG  C   3       7.288  26.914  -3.047  1.00 10.43           C
ANISOU  168  C6  DG  C   3     1466   1242   1255     -9   -154     89       C
ATOM    169  O6  DG  C   3       7.785  27.955  -2.593  1.00 11.02           O
ANISOU  169  O6  DG  C   3     1588   1265   1334   -103    -43     57       O
ATOM    170  OP2 DG  C   3      12.924  23.830  -5.183  1.00 12.81           O
ANISOU  170  OP2 DG  C   3     1572   1627   1665    176     73    233       O
ATOM    171  P   DG  C   4       9.439  22.249 -10.497  1.00 15.51           P
ANISOU  171  P   DG  C   4     2331   2255   1304    597    103     87       P
ATOM    172  OP1 DG  C   4      10.705  22.872 -10.216  1.00 18.85           O
ANISOU  172  OP1 DG  C   4     2211   3390   1562    356    102    781       O
ATOM    173  O5' DG  C   4       8.528  23.486 -10.938  1.00 13.35           O
ANISOU  173  O5' DG  C   4     1974   1822   1275    276    -30    240       O
ATOM    174  C5' DG  C   4       7.167  23.227 -11.331  1.00 13.33           C
ANISOU  174  C5' DG  C   4     1937   1688   1437     36   -175     98       C
ATOM    175  H5' DG  C   4       6.602  22.816 -10.492  1.00 12.17           H
ATOM    176 H5'' DG  C   4       7.140  22.510 -12.154  1.00 12.17           H
ATOM    177  C4' DG  C   4       6.572  24.531 -11.768  1.00 12.36           C
ANISOU  177  C4' DG  C   4     1743   1881   1071     52     86    109       C
ATOM    178  H4' DG  C   4       5.555  24.335 -12.139  1.00 12.43           H
ATOM    179  C3' DG  C   4       7.345  25.271 -12.841  1.00 12.82           C
ANISOU  179  C3' DG  C   4     1710   1976   1185    205     42    315       C
ATOM    180  H3' DG  C   4       7.993  24.596 -13.417  1.00 12.58           H
ATOM    181  O3' DG  C   4       6.391  25.940 -13.634  1.00 15.30           O
ANISOU  181  O3' DG  C   4     1739   2667   1406    334    197    671       O
ATOM    182  C2' DG  C   4       8.137  26.279 -12.057  1.00 12.87           C
ANISOU  182  C2' DG  C   4     1717   1740   1433    122    333    381       C
ATOM    183  H2' DG  C   4       8.362  27.164 -12.652  1.00 12.18           H
ATOM    184 H2'' DG  C   4       9.068  25.847 -11.689  1.00 12.18           H
ATOM    185  C1' DG  C   4       7.175  26.626 -10.927  1.00 12.52           C
ANISOU  185  C1' DG  C   4     1640   1744   1371    143     45    370       C
ATOM    186  H1' DG  C   4       6.448  27.356 -11.309  1.00 12.37           H
ATOM    187  O4' DG  C   4       6.506  25.389 -10.637  1.00 12.43           O
ANISOU  187  O4' DG  C   4     1752   1729   1240     49    174    104       O
ATOM    188  N9  DG  C   4       7.772  27.115  -9.695  1.00 11.74           N
ANISOU  188  N9  DG  C   4     1502   1678   1277      7     25    290       N
ATOM    189  C4  DG  C   4       7.259  28.102  -8.904  1.00 11.12           C
ANISOU  189  C4  DG  C   4     1424   1422   1378   -169    -32    217       C
ATOM    190  C5  DG  C   4       8.149  28.235  -7.860  1.00 10.99           C
ANISOU  190  C5  DG  C   4     1337   1456   1379    -57     52    354       C
ATOM    191  N7  DG  C   4       9.215  27.352  -8.001  1.00 12.01           N
ANISOU  191  N7  DG  C   4     1462   1645   1453    119     42    412       N
ATOM    192  C8  DG  C   4       8.941  26.712  -9.099  1.00 12.71           C
ANISOU  192  C8  DG  C   4     1568   1861   1400    112     29    316       C
ATOM    193  H8  DG  C   4       9.584  25.949  -9.514  1.00 12.18           H
ATOM    194  N3  DG  C   4       6.103  28.775  -9.115  1.00 11.27           N
ANISOU  194  N3  DG  C   4     1348   1345   1587    -22    -59    249       N
ATOM    195  C2  DG  C   4       5.873  29.670  -8.173  1.00 11.37           C
ANISOU  195  C2  DG  C   4     1279   1464   1574   -151   -165    201       C
ATOM    196  N2  DG  C   4       4.731  30.401  -8.190  1.00 12.26           N
ANISOU  196  N2  DG  C   4     1317   1446   1893      1   -351     -7       N
ATOM    197  H22 DG  C   4       4.104  30.303  -8.971  1.00 11.83           H
ATOM    198  H21 DG  C   4       4.551  31.098  -7.486  1.00 11.83           H
ATOM    199  N1  DG  C   4       6.709  29.900  -7.120  1.00 10.99           N
ANISOU  199  N1  DG  C   4     1224   1249   1701    -68    -40    132       N
ATOM    200  H1  DG  C   4       6.410  30.587  -6.404  1.00 11.83           H
ATOM    201  C6  DG  C   4       7.883  29.190  -6.861  1.00 10.80           C
ANISOU  201  C6  DG  C   4     1299   1469   1333   -113   -104    341       C
ATOM    202  O6  DG  C   4       8.547  29.421  -5.849  1.00 11.04           O
ANISOU  202  O6  DG  C   4     1487   1322   1385    -37   -125    263       O
ATOM    203  OP2 DG  C   4       9.253  21.147 -11.435  1.00 20.09           O
ANISOU  203  OP2 DG  C   4     3878   2370   1384   1052     85   -132       O
ATOM    204  P   DC  C   5       6.724  26.576 -15.061  1.00 16.57           P
ANISOU  204  P   DC  C   5     1964   2881   1448    308    113    576       P
ATOM    205  OP1 DC  C   5       6.192  25.703 -16.151  1.00 19.73           O
ANISOU  205  OP1 DC  C   5     2972   3014   1509    184    376    -40       O
ATOM    206  O5' DC  C   5       5.858  27.948 -14.962  1.00 14.57           O
ANISOU  206  O5' DC  C   5     1735   2132   1667   -207   -105    526       O
ATOM    207  C5' DC  C   5       4.406  27.890 -14.912  1.00 13.15           C
ANISOU  207  C5' DC  C   5     1543   1954   1500   -402   -282    127       C
ATOM    208  H5' DC  C   5       4.090  27.076 -14.256  1.00 13.02           H
ATOM    209 H5'' DC  C   5       4.013  27.690 -15.911  1.00 13.02           H
ATOM    210  C4' DC  C   5       3.847  29.195 -14.401  1.00 13.06           C
ANISOU  210  C4' DC  C   5     1420   1932   1610   -133   -135    469       C
ATOM    211  H4' DC  C   5       2.753  29.135 -14.462  1.00 12.81           H
ATOM    212  C3' DC  C   5       4.278  30.480 -15.068  1.00 13.57           C
ANISOU  212  C3' DC  C   5     1576   1946   1632   -232   -381    261       C
ATOM    213  H3' DC  C   5       5.332  30.415 -15.369  1.00 12.92           H
ATOM    214  O3' DC  C   5       3.421  30.695 -16.195  1.00 12.39           O
ANISOU  214  O3' DC  C   5     1517   1776   1415    -28   -274     90       O
ATOM    215  C2' DC  C   5       4.122  31.523 -13.967  1.00 13.82           C
ANISOU  215  C2' DC  C   5     1893   1811   1546   -269   -221     45       C
ATOM    216  H2' DC  C   5       3.100  31.901 -13.932  1.00 13.73           H
ATOM    217 H2'' DC  C   5       4.817  32.353 -14.104  1.00 13.73           H
ATOM    218  C1' DC  C   5       4.427  30.763 -12.705  1.00 14.08           C
ANISOU  218  C1' DC  C   5     1780   2018   1550   -316   -363     36       C
ATOM    219  H1' DC  C   5       3.676  31.044 -11.958  1.00 13.92           H
ATOM    220  O4' DC  C   5       4.234  29.374 -13.047  1.00 13.66           O
ANISOU  220  O4' DC  C   5     1700   1850   1640   -436   -408    299       O
ATOM    221  N1  DC  C   5       5.767  30.885 -12.141  1.00 13.76           N
ANISOU  221  N1  DC  C   5     1860   1845   1522   -439   -387    337       N
ATOM    222  C6  DC  C   5       6.830  30.142 -12.599  1.00 13.76           C
ANISOU  222  C6  DC  C   5     1599   1948   1681   -650    -39     54       C
ATOM    223  H6  DC  C   5       6.684  29.433 -13.399  1.00 12.18           H
ATOM    224  C5  DC  C   5       7.986  30.102 -11.902  1.00 12.45           C
ANISOU  224  C5  DC  C   5     1448   1808   1472   -308    -86    225       C
ATOM    225  H5  DC  C   5       8.765  29.392 -12.147  1.00 12.17           H
ATOM    226  C4  DC  C   5       8.051  30.883 -10.712  1.00 11.98           C
ANISOU  226  C4  DC  C   5     1641   1564   1347   -360   -127    254       C
ATOM    227  N4  DC  C   5       9.111  30.801  -9.900  1.00 11.59           N
ANISOU  227  N4  DC  C   5     1545   1530   1327   -316   -198    238       N
ATOM    228  H42 DC  C   5       9.926  30.294 -10.215  1.00 12.17           H
ATOM    229  H41 DC  C   5       9.213  31.475  -9.157  1.00 12.17           H
ATOM    230  N3  DC  C   5       7.077  31.713 -10.374  1.00 12.81           N
ANISOU  230  N3  DC  C   5     1739   1442   1686   -305   -430    296       N
ATOM    231  C2  DC  C   5       5.912  31.720 -11.069  1.00 14.49           C
ANISOU  231  C2  DC  C   5     1843   1395   2267   -349   -388     53       C
ATOM    232  O2  DC  C   5       4.949  32.448 -10.746  1.00 17.08           O
ANISOU  232  O2  DC  C   5     2340   1631   2519     55   -923    -48       O
ATOM    233  OP2 DC  C   5       8.121  26.956 -15.142  1.00 18.99           O
ANISOU  233  OP2 DC  C   5     1676   3707   1831    253    333    918       O
ATOM    234  P   DG  C   6       3.853  31.566 -17.418  1.00 14.79           P
ANISOU  234  P   DG  C   6     1965   2355   1299    -87    -54    221       P
ATOM    235  OP1 DG  C   6       2.750  31.470 -18.337  1.00 19.56           O
ANISOU  235  OP1 DG  C   6     2657   3294   1481   -498   -585    286       O
ATOM    236  O5' DG  C   6       4.034  33.012 -16.860  1.00 14.09           O
ANISOU  236  O5' DG  C   6     1524   1962   1866   -129    -66    441       O
ATOM    237  C5' DG  C   6       2.899  33.700 -16.336  1.00 14.42           C
ANISOU  237  C5' DG  C   6     1269   1870   2340    -19   -184    176       C
ATOM    238  H5' DG  C   6       2.575  33.281 -15.385  1.00 13.73           H
ATOM    239 H5'' DG  C   6       2.067  33.657 -17.041  1.00 13.73           H
ATOM    240  C4' DG  C   6       3.345  35.121 -16.160  1.00 17.27           C
ANISOU  240  C4' DG  C   6     1312   2093   3155   -292   -382     81       C
ATOM    241  H4' DG  C   6       2.473  35.741 -15.909  1.00 16.39           H
ATOM    242  C3' DG  C   6       4.056  35.705 -17.384  1.00 17.83           C
ANISOU  242  C3' DG  C   6     1505   2040   3229   -213   -564    499       C
ATOM    243  H3' DG  C   6       3.804  35.146 -18.297  1.00 17.22           H
ATOM    244  O3' DG  C   6       3.635  37.058 -17.452  1.00 20.64           O
ANISOU  244  O3' DG  C   6     1694   2128   4017   -287   -861    773       O
ATOM    245  C2' DG  C   6       5.528  35.593 -17.058  1.00 16.54           C
ANISOU  245  C2' DG  C   6     1496   2081   2707   -123   -460    266       C
ATOM    246  H2' DG  C   6       6.093  36.430 -17.470  1.00 14.10           H
ATOM    247 H2'' DG  C   6       5.934  34.669 -17.463  1.00 14.10           H
ATOM    248  C1' DG  C   6       5.565  35.624 -15.523  1.00 15.01           C
ANISOU  248  C1' DG  C   6     1332   1771   2597    -68   -279    -77       C
ATOM    249  H1' DG  C   6       5.703  36.662 -15.193  1.00 14.92           H
ATOM    250  O4' DG  C   6       4.293  35.139 -15.083  1.00 17.88           O
ANISOU  250  O4' DG  C   6     1445   2746   2600   -164   -230   -316       O
ATOM    251  N9  DG  C   6       6.595  34.762 -14.943  1.00 13.94           N
ANISOU  251  N9  DG  C   6     1440   1698   2158   -180   -215     68       N
ATOM    252  C4  DG  C   6       7.299  35.017 -13.796  1.00 13.32           C
ANISOU  252  C4  DG  C   6     1328   1612   2120    -64    -43    -58       C
ATOM    253  C5  DG  C   6       8.091  33.906 -13.582  1.00 11.90           C
ANISOU  253  C5  DG  C   6     1259   1552   1710   -172    106    107       C
ATOM    254  N7  DG  C   6       7.909  32.994 -14.598  1.00 11.95           N
ANISOU  254  N7  DG  C   6     1454   1679   1405   -166    -26    108       N
ATOM    255  C8  DG  C   6       7.014  33.542 -15.390  1.00 13.35           C
ANISOU  255  C8  DG  C   6     1463   1909   1700   -203    -14     69       C
ATOM    256  H8  DG  C   6       6.616  33.044 -16.262  1.00 14.09           H
ATOM    257  N3  DG  C   6       7.183  36.124 -13.042  1.00 15.59           N
ANISOU  257  N3  DG  C   6     1487   1980   2453    186   -429   -493       N
ATOM    258  C2  DG  C   6       7.997  36.094 -11.996  1.00 14.61           C
ANISOU  258  C2  DG  C   6     1529   1771   2251     54    -73   -346       C
ATOM    259  N2  DG  C   6       8.029  37.125 -11.156  1.00 19.02           N
ANISOU  259  N2  DG  C   6     1708   2272   3245    313   -329  -1185       N
ATOM    260  H22 DG  C   6       7.411  37.910 -11.303  1.00 18.14           H
ATOM    261  H21 DG  C   6       8.641  37.117 -10.355  1.00 18.14           H
ATOM    262  N1  DG  C   6       8.853  35.045 -11.704  1.00 12.91           N
ANISOU  262  N1  DG  C   6     1350   1480   2072      4     25   -206       N
ATOM    263  H1  DG  C   6       9.473  35.137 -10.877  1.00 18.13           H
ATOM    264  C6  DG  C   6       8.990  33.905 -12.468  1.00 11.39           C
ANISOU  264  C6  DG  C   6     1348   1317   1662   -127    296   -105       C
ATOM    265  O6  DG  C   6       9.844  33.071 -12.157  1.00 11.17           O
ANISOU  265  O6  DG  C   6     1518   1319   1407    -44    174      1       O
ATOM    266  OP2 DG  C   6       5.197  31.176 -17.819  1.00 19.16           O
ANISOU  266  OP2 DG  C   6     2838   2761   1678   -163    646     50       O
ATOM    267  P   DC  C   7       4.077  38.089 -18.581  1.00 25.26           P
ANISOU  267  P   DC  C   7     2748   2421   4427   -615  -1842    945       P
ATOM    268  OP1 DC  C   7       2.995  39.041 -18.794  1.00 38.91           O
ANISOU  268  OP1 DC  C   7     3239   3107   8437   -800  -3290   2105       O
ATOM    269  O5' DC  C   7       5.342  38.832 -17.949  1.00 19.65           O
ANISOU  269  O5' DC  C   7     1893   2396   3176   -583   -987    718       O
ATOM    270  C5' DC  C   7       5.104  39.696 -16.822  1.00 18.31           C
ANISOU  270  C5' DC  C   7     1355   2344   3258    107   -167    250       C
ATOM    271  H5' DC  C   7       4.504  39.176 -16.071  1.00 17.03           H
ATOM    272 H5'' DC  C   7       4.556  40.584 -17.144  1.00 17.03           H
ATOM    273  C4' DC  C   7       6.430  40.099 -16.227  1.00 15.83           C
ANISOU  273  C4' DC  C   7     1577   1901   2534    125     59    170       C
ATOM    274  H4' DC  C   7       6.276  40.898 -15.488  1.00 15.40           H
ATOM    275  C3' DC  C   7       7.523  40.509 -17.203  1.00 14.32           C
ANISOU  275  C3' DC  C   7     1338   1665   2435     20   -124     53       C
ATOM    276  H3' DC  C   7       7.537  39.869 -18.096  1.00 14.24           H
ATOM    277  O3' DC  C   7       7.315  41.892 -17.501  1.00 15.32           O
ANISOU  277  O3' DC  C   7     1450   1914   2458      5   -196    102       O
ATOM    278  C2' DC  C   7       8.792  40.304 -16.370  1.00 13.80           C
ANISOU  278  C2' DC  C   7     1397   1745   2098    -19     -4     79       C
ATOM    279  H2' DC  C   7       9.066  41.220 -15.842  1.00 13.50           H
ATOM    280 H2'' DC  C   7       9.625  39.979 -16.997  1.00 13.50           H
ATOM    281  C1' DC  C   7       8.383  39.205 -15.387  1.00 14.22           C
ANISOU  281  C1' DC  C   7     1486   1676   2239    192    -85    -83       C
ATOM    282  H1' DC  C   7       8.503  39.599 -14.371  1.00 14.07           H
ATOM    283  O4' DC  C   7       6.981  38.939 -15.604  1.00 14.88           O
ANISOU  283  O4' DC  C   7     1343   1826   2482     16     77    208       O
ATOM    284  N1  DC  C   7       9.084  37.922 -15.535  1.00 13.10           N
ANISOU  284  N1  DC  C   7     1366   1661   1950    -27   -151    -29       N
ATOM    285  C6  DC  C   7       8.875  37.147 -16.649  1.00 13.54           C
ANISOU  285  C6  DC  C   7     1232   1846   2066    -86     -8    -71       C
ATOM    286  H6  DC  C   7       8.190  37.494 -17.410  1.00 14.09           H
ATOM    287  C5  DC  C   7       9.428  35.933 -16.764  1.00 12.36           C
ANISOU  287  C5  DC  C   7     1308   1741   1646   -136     66   -165       C
ATOM    288  H5  DC  C   7       9.240  35.304 -17.625  1.00 14.09           H
ATOM    289  C4  DC  C   7      10.262  35.501 -15.692  1.00 11.93           C
ANISOU  289  C4  DC  C   7     1231   1540   1760   -178    213   -126       C
ATOM    290  N4  DC  C   7      10.854  34.316 -15.756  1.00 12.58           N
ANISOU  290  N4  DC  C   7     1382   1499   1897   -169    144   -189       N
ATOM    291  H42 DC  C   7      10.712  33.725 -16.563  1.00 14.09           H
ATOM    292  H41 DC  C   7      11.469  34.014 -15.016  1.00 14.09           H
ATOM    293  N3  DC  C   7      10.477  36.264 -14.613  1.00 12.19           N
ANISOU  293  N3  DC  C   7     1213   1483   1933   -160     82   -108       N
ATOM    294  C2  DC  C   7       9.921  37.483 -14.524  1.00 12.49           C
ANISOU  294  C2  DC  C   7     1230   1610   1903    -99     52   -278       C
ATOM    295  O2  DC  C   7      10.129  38.198 -13.550  1.00 13.19           O
ANISOU  295  O2  DC  C   7     1447   1711   1852    124   -167   -288       O
ATOM    296  OP2 DC  C   7       4.693  37.330 -19.726  1.00 22.37           O
ANISOU  296  OP2 DC  C   7     2996   2674   2827   -940  -1105   1193       O
ATOM    297  P   DC  C   8       7.583  42.435 -18.990  1.00 17.26           P
ANISOU  297  P   DC  C   8     1761   2195   2599    -85   -534    224       P
ATOM    298  OP1 DC  C   8       7.136  43.810 -19.016  1.00 20.21           O
ANISOU  298  OP1 DC  C   8     1960   2380   3337    240   -407    677       O
ATOM    299  O5' DC  C   8       9.159  42.424 -19.161  1.00 14.48           O
ANISOU  299  O5' DC  C   8     1674   1852   1976     -4   -313     11       O
ATOM    300  C5' DC  C   8       9.981  43.258 -18.379  1.00 13.61           C
ANISOU  300  C5' DC  C   8     1682   1528   1961    120   -269     -4       C
ATOM    301  H5' DC  C   8       9.801  43.066 -17.319  1.00 13.48           H
ATOM    302 H5'' DC  C   8       9.747  44.305 -18.581  1.00 13.48           H
ATOM    303  C4' DC  C   8      11.425  42.988 -18.708  1.00 13.22           C
ANISOU  303  C4' DC  C   8     1520   1949   1553     66   -176    324       C
ATOM    304  H4' DC  C   8      12.063  43.683 -18.145  1.00 13.31           H
ATOM    305  C3' DC  C   8      11.801  43.042 -20.195  1.00 14.48           C
ANISOU  305  C3' DC  C   8     1889   2096   1514    213   -418    282       C
ATOM    306  H3' DC  C   8      10.889  43.023 -20.807  1.00 14.21           H
ATOM    307  O3' DC  C   8      12.498  44.272 -20.374  1.00 15.90           O
ANISOU  307  O3' DC  C   8     2281   1676   2084    222     47    490       O
ATOM    308  C2' DC  C   8      12.616  41.778 -20.468  1.00 13.26           C
ANISOU  308  C2' DC  C   8     1845   1746   1444    174    -36     97       C
ATOM    309  H2' DC  C   8      13.584  42.036 -20.898  1.00 12.73           H
ATOM    310 H2'' DC  C   8      12.086  41.117 -21.156  1.00 12.73           H
ATOM    311  C1' DC  C   8      12.795  41.151 -19.109  1.00 12.61           C
ANISOU  311  C1' DC  C   8     1595   1833   1364    190     28    159       C
ATOM    312  H1' DC  C   8      13.744  41.502 -18.682  1.00 12.82           H
ATOM    313  O4' DC  C   8      11.696  41.647 -18.319  1.00 13.79           O
ANISOU  313  O4' DC  C   8     1916   1895   1425    456     31    295       O
ATOM    314  N1  DC  C   8      12.691  39.695 -19.066  1.00 11.81           N
ANISOU  314  N1  DC  C   8     1456   1771   1259    115   -122     90       N
ATOM    315  C6  DC  C   8      11.531  39.109 -19.502  1.00 12.92           C
ANISOU  315  C6  DC  C   8     1400   1986   1522    202   -159    108       C
ATOM    316  H6  DC  C   8      10.729  39.729 -19.877  1.00 12.73           H
ATOM    317  C5  DC  C   8      11.365  37.786 -19.431  1.00 13.17           C
ANISOU  317  C5  DC  C   8     1439   1979   1584     62   -191    189       C
ATOM    318  H5  DC  C   8      10.419  37.328 -19.691  1.00 12.73           H
ATOM    319  C4  DC  C   8      12.397  37.034 -18.804  1.00 11.62           C
ANISOU  319  C4  DC  C   8     1322   1943   1150     -1    -31    138       C
ATOM    320  N4  DC  C   8      12.272  35.720 -18.663  1.00 12.21           N
ANISOU  320  N4  DC  C   8     1371   1725   1542    -85    -16    -45       N
ATOM    321  H42 DC  C   8      11.435  35.257 -18.987  1.00 12.73           H
ATOM    322  H41 DC  C   8      13.042  35.172 -18.308  1.00 12.73           H
ATOM    323  N3  DC  C   8      13.544  37.593 -18.430  1.00 10.98           N
ANISOU  323  N3  DC  C   8     1271   1538   1362    -27     58     12       N
ATOM    324  C2  DC  C   8      13.712  38.925 -18.548  1.00 11.46           C
ANISOU  324  C2  DC  C   8     1347   1661   1344    156      6     -1       C
ATOM    325  O2  DC  C   8      14.773  39.469 -18.212  1.00 11.29           O
ANISOU  325  O2  DC  C   8     1432   1510   1345     86    -60     14       O
ATOM    326  OP2 DC  C   8       7.131  41.482 -20.046  1.00 21.00           O
ANISOU  326  OP2 DC  C   8     2289   3041   2648   -510   -806    269       O
ATOM    327  P   DG  C   9      12.728  44.955 -21.778  1.00 18.76           P
ANISOU  327  P   DG  C   9     2431   2450   2247    401   -151    772       P
ATOM    328  OP1 DG  C   9      13.019  46.393 -21.518  1.00 23.30           O
ANISOU  328  OP1 DG  C   9     3186   1882   3782    494    690    826       O
ATOM    329  O5' DG  C   9      14.033  44.222 -22.355  1.00 17.41           O
ANISOU  329  O5' DG  C   9     2481   2433   1700    124    -11    489       O
ATOM    330  C5' DG  C   9      15.268  44.412 -21.692  1.00 15.56           C
ANISOU  330  C5' DG  C   9     2069   1955   1886    101     -9    309       C
ATOM    331  H5' DG  C   9      15.133  44.250 -20.622  1.00 15.74           H
ATOM    332 H5'' DG  C   9      15.616  45.435 -21.842  1.00 15.74           H
ATOM    333  C4' DG  C   9      16.284  43.447 -22.216  1.00 17.01           C
ANISOU  333  C4' DG  C   9     2295   2197   1969   -140    227   -102       C
ATOM    334  H4' DG  C   9      17.270  43.662 -21.780  1.00 17.08           H
ATOM    335  C3' DG  C   9      16.364  43.437 -23.722  1.00 21.06           C
ANISOU  335  C3' DG  C   9     3293   2484   2223   -495   1243    -17       C
ATOM    336  H3' DG  C   9      15.928  44.363 -24.123  1.00 20.30           H
ATOM    337  O3' DG  C   9      17.715  43.298 -24.090  1.00 28.86           O
ANISOU  337  O3' DG  C   9     3556   4139   3268  -1390   1755   -971       O
ATOM    338  C2' DG  C   9      15.541  42.259 -24.163  1.00 18.29           C
ANISOU  338  C2' DG  C   9     2883   2403   1662   -262    530    108       C
ATOM    339  H2' DG  C   9      15.882  41.866 -25.123  1.00 17.87           H
ATOM    340 H2'' DG  C   9      14.484  42.514 -24.211  1.00 17.87           H
ATOM    341  C1' DG  C   9      15.852  41.332 -23.051  1.00 17.49           C
ANISOU  341  C1' DG  C   9     2404   2086   2155   -272    419    -69       C
ATOM    342  H1' DG  C   9      16.869  40.945 -23.213  1.00 17.63           H
ATOM    343  O4' DG  C   9      15.840  42.124 -21.867  1.00 15.72           O
ANISOU  343  O4' DG  C   9     2101   2030   1841      5    119      4       O
ATOM    344  N9  DG  C   9      14.954  40.216 -22.862  1.00 14.47           N
ANISOU  344  N9  DG  C   9     1879   1938   1680     10    293   -193       N
ATOM    345  C4  DG  C   9      15.276  39.094 -22.153  1.00 14.17           C
ANISOU  345  C4  DG  C   9     1812   1843   1726    -10    457   -207       C
ATOM    346  C5  DG  C   9      14.163  38.278 -22.225  1.00 13.98           C
ANISOU  346  C5  DG  C   9     1727   2041   1544     33    149    -59       C
ATOM    347  N7  DG  C   9      13.166  38.868 -22.996  1.00 15.87           N
ANISOU  347  N7  DG  C   9     1622   2370   2036    118    -23      7       N
ATOM    348  C8  DG  C   9      13.693  40.004 -23.380  1.00 15.40           C
ANISOU  348  C8  DG  C   9     1801   2393   1655     26     30     73       C
ATOM    349  H8  DG  C   9      13.164  40.717 -23.990  1.00 17.87           H
ATOM    350  N3  DG  C   9      16.432  38.896 -21.487  1.00 13.41           N
ANISOU  350  N3  DG  C   9     1547   1997   1548     45     89   -313       N
ATOM    351  C2  DG  C   9      16.465  37.733 -20.895  1.00 11.78           C
ANISOU  351  C2  DG  C   9     1477   1816   1182    -60    -30   -248       C
ATOM    352  N2  DG  C   9      17.527  37.378 -20.185  1.00 12.40           N
ANISOU  352  N2  DG  C   9     1435   1805   1472   -123    113   -296       N
ATOM    353  H22 DG  C   9      18.304  38.011 -20.132  1.00 12.21           H
ATOM    354  H21 DG  C   9      17.582  36.476 -19.742  1.00 12.21           H
ATOM    355  N1  DG  C   9      15.454  36.818 -20.983  1.00 12.26           N
ANISOU  355  N1  DG  C   9     1361   1875   1419    -18     48   -186       N
ATOM    356  H1  DG  C   9      15.570  35.924 -20.470  1.00 12.21           H
ATOM    357  C6  DG  C   9      14.260  36.988 -21.675  1.00 13.56           C
ANISOU  357  C6  DG  C   9     1553   2183   1414      2    194     84       C
ATOM    358  O6  DG  C   9      13.441  36.077 -21.677  1.00 14.39           O
ANISOU  358  O6  DG  C   9     1362   2322   1782   -144    -40    -40       O
ATOM    359  OP2 DG  C   9      11.693  44.509 -22.724  1.00 21.57           O
ANISOU  359  OP2 DG  C   9     2678   3454   2060    440   -288   1030       O
ATOM    360  P   DA  C  10      18.345  44.435 -25.028  1.00 43.25           P
ANISOU  360  P   DA  C  10     6141   6367   3924  -3357   2770  -1998       P
ATOM    361  OP1 DA  C  10      17.432  44.784 -26.163  1.00 87.00           O
ANISOU  361  OP1 DA  C  10    14121  15513   3420  -2493    706   -302       O
ATOM    362  OP2 DA  C  10      19.666  44.032 -25.320  1.00 41.08           O
ANISOU  362  OP2 DA  C  10     4504   5349   5753  -1811   1121  -2261       O
ATOM    363  O5' DA  C  10      18.382  45.752 -24.153  1.00 41.35           O
ANISOU  363  O5' DA  C  10     7238   5519   2951  -3575   1994   -501       O
ATOM    364  C5' DA  C  10      19.423  45.899 -23.230  1.00 30.71           C
ANISOU  364  C5' DA  C  10     3848   4216   3604  -1169   1736  -1126       C
ATOM    365  H5' DA  C  10      20.380  46.012 -23.743  1.00 28.61           H
ATOM    366 H5'' DA  C  10      19.475  45.031 -22.568  1.00 28.61           H
ATOM    367  C4' DA  C  10      19.092  47.127 -22.454  1.00 24.24           C
ANISOU  367  C4' DA  C  10     4163   2846   2198  -1204   1178      5       C
ATOM    368  H4' DA  C  10      18.809  47.940 -23.138  1.00 23.76           H
ATOM    369  C3' DA  C  10      20.244  47.564 -21.557  1.00 25.85           C
ANISOU  369  C3' DA  C  10     3669   3916   2237   -545    768    394       C
ATOM    370  H3' DA  C  10      21.215  47.249 -21.962  1.00 28.61           H
ATOM    371  O3' DA  C  10      20.128  48.984 -21.437  1.00 36.67           O
ANISOU  371  O3' DA  C  10     5334   3821   4775  -1017    477   2008       O
ATOM    372 HO3' DA  C  10      20.695  49.473 -20.796  1.00 37.97           H
ATOM    373  C2' DA  C  10      19.922  46.849 -20.262  1.00 28.86           C
ANISOU  373  C2' DA  C  10     2903   4808   3253  -1259   -330   1840       C
ATOM    374  H2' DA  C  10      20.349  47.377 -19.408  1.00 33.36           H
ATOM    375 H2'' DA  C  10      20.288  45.822 -20.285  1.00 33.36           H
ATOM    376  C1' DA  C  10      18.399  46.916 -20.235  1.00 20.81           C
ANISOU  376  C1' DA  C  10     3087   2913   1905   -268    141    603       C
ATOM    377  H1' DA  C  10      18.118  47.919 -19.884  1.00 21.08           H
ATOM    378  O4' DA  C  10      17.980  46.765 -21.579  1.00 20.97           O
ANISOU  378  O4' DA  C  10     3171   2974   1819   -510    380    223       O
ATOM    379  N9  DA  C  10      17.695  45.914 -19.433  1.00 18.01           N
ANISOU  379  N9  DA  C  10     2282   2606   1953   -156    167    654       N
ATOM    380  C4  DA  C  10      16.474  46.110 -18.841  1.00 16.42           C
ANISOU  380  C4  DA  C  10     2437   2137   1663     12   -215    154       C
ATOM    381  C5  DA  C  10      16.175  44.924 -18.182  1.00 14.22           C
ANISOU  381  C5  DA  C  10     2063   1966   1374   -222   -194    161       C
ATOM    382  N7  DA  C  10      17.215  44.015 -18.321  1.00 16.14           N
ANISOU  382  N7  DA  C  10     2138   2156   1838    -51    179    197       N
ATOM    383  C8  DA  C  10      18.066  44.632 -19.109  1.00 17.77           C
ANISOU  383  C8  DA  C  10     2193   2536   2021    290    422    495       C
ATOM    384  H8  DA  C  10      19.019  44.202 -19.390  1.00 33.32           H
ATOM    385  N3  DA  C  10      15.697  47.196 -18.940  1.00 17.30           N
ANISOU  385  N3  DA  C  10     2805   1972   1794      6    -78    308       N
ATOM    386  C2  DA  C  10      14.572  47.038 -18.266  1.00 16.86           C
ANISOU  386  C2  DA  C  10     2735   1938   1732    257    -97    488       C
ATOM    387  H2  DA  C  10      13.900  47.888 -18.269  1.00 16.85           H
ATOM    388  N1  DA  C  10      14.159  45.965 -17.551  1.00 15.07           N
ANISOU  388  N1  DA  C  10     2321   1854   1548     71   -229    178       N
ATOM    389  C6  DA  C  10      14.941  44.866 -17.509  1.00 13.31           C
ANISOU  389  C6  DA  C  10     1988   1845   1224     53   -170    122       C
ATOM    390  N6  DA  C  10      14.534  43.823 -16.785  1.00 12.04           N
ANISOU  390  N6  DA  C  10     1708   1702   1164     96    -94     34       N
ATOM    391  H62 DA  C  10      13.637  43.845 -16.323  1.00 12.00           H
ATOM    392  H61 DA  C  10      15.106  42.992 -16.736  1.00 12.00           H
HETATM  393  O   HOH E   1       6.901  17.245  -0.862  1.00 12.64           O
ANISOU  393  O   HOH E   1     1703   1359   1740   -105     -6    116       O
HETATM  394  O   HOH E   3      11.069  28.284 -11.181  1.00 12.55           O
ANISOU  394  O   HOH E   3     1156   2213   1398   -206    161    550       O
HETATM  395  O   HOH E   4      11.767  25.662  -6.935  1.00 12.03           O
ANISOU  395  O   HOH E   4     1590   1598   1380     96    176    238       O
HETATM  396  O   HOH E   5      12.285  26.245  -3.896  1.00 13.17           O
ANISOU  396  O   HOH E   5     1616   1600   1785     -2   -109    246       O
HETATM  397  O   HOH E   6       4.408  18.165  -1.872  1.00 14.04           O
ANISOU  397  O   HOH E   6     2010   1611   1711    104   -150    -35       O
HETATM  398  O   HOH E   7       3.564  22.992 -10.534  1.00 21.26           O
ANISOU  398  O   HOH E   7     2994   2342   2740     -9    109   -253       O
HETATM  399  O   HOH E   8       4.016  18.875  -4.509  1.00 15.77           O
ANISOU  399  O   HOH E   8     2034   2196   1760    304   -118    -36       O
HETATM  400  O   HOH E   9      10.304  28.939  -3.133  1.00 12.22           O
ANISOU  400  O   HOH E   9     1599   1734   1307   -129    -62      6       O
HETATM  401  O   HOH E  10       5.758  20.020  -6.447  1.00 16.31           O
ANISOU  401  O   HOH E  10     1962   1967   2266   -330   -143    -56       O
HETATM  402  O   HOH E  11      11.175  30.798  -6.283  1.00 14.57           O
ANISOU  402  O   HOH E  11     1532   1430   2573   -145   -101    497       O
HETATM  403  O   HOH E  12      10.265  32.330 -17.841  1.00 26.84           O
ANISOU  403  O   HOH E  12     3513   3211   3474  -1236    979  -1721       O
HETATM  404  O   HOH E  13       9.823  41.022 -12.788  1.00 19.96           O
ANISOU  404  O   HOH E  13     2378   2778   2426    221   -816   -380       O
HETATM  405  O   HOH E  14      12.868  18.546  -1.348  1.00 24.74           O
ANISOU  405  O   HOH E  14     3526   2694   3177   -697   -219    262       O
HETATM  406  O   HOH E  15       2.438  17.569   4.358  1.00 19.99           O
ANISOU  406  O   HOH E  15     2644   1727   3224    -73   -860    145       O
HETATM  407  O   HOH E  16       7.720  37.101 -19.776  1.00 24.09           O
ANISOU  407  O   HOH E  16     3149   3391   2611   -497   -852    157       O
HETATM  408  O   HOH E  17      13.240  27.044   2.292  1.00 23.02           O
ANISOU  408  O   HOH E  17     3384   2490   2871   -776    152    406       O
HETATM  409  O   HOH E  18       9.376  30.857 -15.436  1.00 20.36           O
ANISOU  409  O   HOH E  18     2851   2751   2131    650   -143   -461       O
HETATM  410  O   HOH E  19      18.438  40.501 -20.346  1.00 16.26           O
ANISOU  410  O   HOH E  19     1941   1993   2244   -135     22    -30       O
HETATM  411  O   HOH E  20      11.084  35.523 -22.765  1.00 25.89           O
ANISOU  411  O   HOH E  20     2053   4344   3438   -654   -505    184       O
HETATM  412  O   HOH E  21      15.880  49.609 -20.369  1.00 28.50           O
ANISOU  412  O   HOH E  21     5415   2742   2670   -259     24   1157       O
HETATM  413  O   HOH E  22       5.006  37.958 -12.870  1.00 26.81           O
ANISOU  413  O   HOH E  22     2034   3458   4692    727   -875  -1615       O
HETATM  414  O   HOH E  23      13.761  26.690  -1.573  1.00 19.57           O
ANISOU  414  O   HOH E  23     2497   2615   2322   -517   -872    294       O
HETATM  415  O   HOH E  24      13.332  29.300  -4.581  1.00 20.36           O
ANISOU  415  O   HOH E  24     2074   2440   3221   -630   -698   1091       O
HETATM  416  O   HOH E  25      -0.171  35.516 -17.816  1.00 22.58           O
ANISOU  416  O   HOH E  25     2707   2770   3100   -370   -296    537       O
HETATM  417  O   HOH E  26       7.615  40.217 -11.194  1.00 22.57           O
ANISOU  417  O   HOH E  26     2954   1959   3660     73   -284   -643       O
HETATM  418  O   HOH E  27      11.905  25.170  -9.694  1.00 20.83           O
ANISOU  418  O   HOH E  27     2297   3895   1721    598    332   -188       O
HETATM  419  O   HOH E  28       8.673  39.285 -21.052  1.00 24.29           O
ANISOU  419  O   HOH E  28     2760   3004   3465   -406   -408     -1       O
HETATM  420  O   HOH E  29      18.143  41.493 -17.738  1.00 16.49           O
ANISOU  420  O   HOH E  29     1919   2432   1912    116    203    -99       O
HETATM  421  O   HOH E  30      23.253  45.083 -20.945  1.00 41.22           O
ANISOU  421  O   HOH E  30     3541   5749   6369    -77    494   -376       O
HETATM  422  O   HOH E  31      23.844  46.448 -23.566  1.00 22.54           O
ANISOU  422  O   HOH E  31     2653   2931   2980    325    530   -406       O
HETATM  423  O   HOH E  32      12.441  28.437  -7.981  1.00 27.95           O
ANISOU  423  O   HOH E  32     5266   2510   2840  -1871   2053   -444       O
HETATM  424  O   HOH E  33       1.595  19.570   1.194  1.00 33.48           O
ANISOU  424  O   HOH E  33     2425   4857   5436     15   -357  -2508       O
HETATM  425  O   HOH E  34       4.223  22.126  -7.590  1.00 21.66           O
ANISOU  425  O   HOH E  34     2496   2260   3473     23   -464    -23       O
HETATM  426  O   HOH E  35       8.525  18.731 -10.301  1.00 26.77           O
ANISOU  426  O   HOH E  35     4234   2913   3020     56   -695    229       O
HETATM  427  O   HOH E  36      -0.012  18.740   5.332  1.00 23.53           O
ANISOU  427  O   HOH E  36     2796   2999   3145   -744   -371    874       O
HETATM  428  O   HOH E  37      11.405  29.409   1.534  1.00 28.98           O
ANISOU  428  O   HOH E  37     4137   3326   3545  -1302   -763   -435       O
HETATM  429  O   HOH E  38       7.138  32.861 -18.723  1.00 35.71           O
ANISOU  429  O   HOH E  38     2689   6014   4863   -117    648    537       O
HETATM  430  O   HOH E  39       9.009  30.000   7.075  1.00 37.44           O
ANISOU  430  O   HOH E  39     5684   1920   6621   -900    724   -797       O
HETATM  431  O   HOH E  40       0.292  20.759   7.265  1.00 27.66           O
ANISOU  431  O   HOH E  40     1957   3681   4872   -148   -276   -249       O
HETATM  432  O   HOH E  41       6.787  29.238 -18.684  1.00 29.23           O
ANISOU  432  O   HOH E  41     4105   3466   3534    282    851    409       O
HETATM  433  O   HOH E  42      20.933  46.168 -26.915  1.00 29.19           O
ANISOU  433  O   HOH E  42     4025   3798   3268      8   1440     51       O
HETATM  434  O   HOH E  43       9.958  34.749 -20.292  1.00 22.28           O
ANISOU  434  O   HOH E  43     2469   3646   2349   -929   -371   -131       O
HETATM  435  O   HOH E  44       2.580  27.641 -18.409  1.00 30.50           O
ANISOU  435  O   HOH E  44     3256   6006   2326  -1407   -298    284       O
HETATM  436  O   HOH E  45      14.872  48.086 -22.629  1.00 36.67           O
ANISOU  436  O   HOH E  45     5698   4150   4083  -1963  -1395   1973       O
HETATM  437  O   HOH E  46      16.245  22.587  -2.732  1.00 35.98           O
ANISOU  437  O   HOH E  46     3142   6846   3682   1723   -881  -1823       O
HETATM  438  O   HOH E  47       5.586  21.881 -14.198  1.00 27.75           O
ANISOU  438  O   HOH E  47     4101   3607   2833   -602   -936   -339       O
HETATM  439  O   HOH E  48      16.990  23.310   7.938  1.00 53.56           O
ANISOU  439  O   HOH E  48     7179   8048   5124  -1960  -1533    -88       O
HETATM  440  O   HOH E  49      10.426  38.589 -23.264  1.00 34.15           O
ANISOU  440  O   HOH E  49     2308   6145   4521  -1011  -1266   2228       O
HETATM  441  O   HOH E  50      15.688  43.282 -27.514  1.00 36.46           O
ANISOU  441  O   HOH E  50     6019   4621   3210    511     41    -39       O
HETATM  442  O   HOH E  51      10.458  27.833 -14.191  1.00 44.83           O
ANISOU  442  O   HOH E  51     5272   7935   3826  -3139   1433  -2213       O
HETATM  443  O   HOH E  52      13.157  24.794   7.522  1.00 31.32           O
ANISOU  443  O   HOH E  52     5307   2970   3620   -812   1249      4       O
HETATM  444  O   HOH E  53       5.150  26.899 -18.475  1.00 30.18           O
ANISOU  444  O   HOH E  53     3986   5092   2388   -410   -198   1090       O
HETATM  445  O   HOH E  54       5.517  40.731 -12.806  1.00 37.81           O
ANISOU  445  O   HOH E  54     4891   3319   6156   -309   2070  -1093       O
HETATM  446  O   HOH E  55      14.759  26.577  -8.419  1.00 41.53           O
ANISOU  446  O   HOH E  55     3192   5182   7402    881   2436   2801       O
HETATM  447  O   HOH E  56       1.125  33.533 -19.698  1.00 39.14           O
ANISOU  447  O   HOH E  56     7099   3585   4184    521  -2325    117       O
HETATM  448  O   HOH E  57       4.142  36.837 -10.926  1.00 40.52           O
ANISOU  448  O   HOH E  57     3300   4965   7127   -104   -595   1911       O
HETATM  449  O   HOH E  58      16.079  20.451   0.436  1.00 33.66           O
ANISOU  449  O   HOH E  58     3120   3418   6249   -111   -687    483       O
HETATM  450  O   HOH E  59      10.863  47.869 -19.739  1.00 69.80           O
ANISOU  450  O   HOH E  59    13024   4325   9170   3456  -5537  -3596       O
HETATM  451  O   HOH E  60       0.076  22.009   2.031  1.00 38.20           O
ANISOU  451  O   HOH E  60     6114   5297   3102  -3378   -640   1035       O
HETATM  452  O   HOH E  61      12.070  42.484 -24.676  1.00 35.09           O
ANISOU  452  O   HOH E  61     4149   3133   6048    228  -2084   1211       O
HETATM  453  O   HOH E  62      15.532  24.467  -4.930  1.00 31.96           O
ANISOU  453  O   HOH E  62     1978   4118   6044   -511    489  -1491       O
HETATM  454  O   HOH E  63      12.417  29.217  -1.388  1.00 31.08           O
ANISOU  454  O   HOH E  63     3716   4241   3850  -1694  -1888   1676       O
HETATM  455  O   HOH E  65      -0.866  21.059   4.100  1.00 36.98           O
ANISOU  455  O   HOH E  65     2682   5163   6204   -147   -215   3408       O
HETATM  456  O   HOH E  66       1.367  35.308 -13.273  1.00 37.86           O
ANISOU  456  O   HOH E  66     5679   5250   3454  -2954   -419   -508       O
HETATM  457  O   HOH E  67       1.235  38.988 -15.690  1.00 37.84           O
ANISOU  457  O   HOH E  67     3844   4185   6348    366  -1062    627       O
HETATM  458  O   HOH E  68      -2.651  35.526 -18.940  1.00 35.65           O
ANISOU  458  O   HOH E  68     4437   5784   3321      0   -114   1043       O
HETATM  459  O   HOH E  70      15.471  27.178   4.339  1.00 46.87           O
ANISOU  459  O   HOH E  70     7212   6927   3669  -3829   -468   -587       O
HETATM  460  O   HOH E  71      11.117  24.719 -13.791  1.00 55.29           O
ANISOU  460  O   HOH E  71     5661   7693   7653  -1997   3436   -803       O
HETATM  461  O   HOH E  72       8.090  20.905 -14.261  1.00 42.06           O
ANISOU  461  O   HOH E  72     6842   5242   3894    399    490    182       O
HETATM  462  O   HOH E  73       2.715  37.778 -14.133  1.00 42.03           O
ANISOU  462  O   HOH E  73     5147   3762   7059    251  -2549     -8       O
HETATM  463  O   HOH E  75       0.617  38.154 -18.281  1.00 40.88           O
ANISOU  463  O   HOH E  75     3404   3298   8830    -38    205   1243       O
HETATM  464  O   HOH E  77       4.245  28.833 -21.823  1.00 51.16           O
ANISOU  464  O   HOH E  77     7047   6303   6089  -1388    368   2080       O
HETATM  465  O   HOH E  78       8.725  28.876 -17.017  1.00 40.65           O
ANISOU  465  O   HOH E  78     4311   4087   7045  -1143    805   1904       O
HETATM  466  O   HOH E  79      11.036  31.414   3.359  1.00 44.05           O
ANISOU  466  O   HOH E  79     7494   3087   6153   -492  -1060   -343       O
HETATM  467  O   HOH E  87       6.686  34.908 -23.138  1.00 49.80           O
ANISOU  467  O   HOH E  87     4929   7673   6318   -415   -590   -820       O
HETATM  468  O   HOH E  88      -1.125  28.859   7.163  1.00 47.37           O
ANISOU  468  O   HOH E  88     7473   6636   3888   -912   1186  -1822       O
HETATM  469  O   HOH E  89       0.405  36.641 -14.201  1.00 31.56           O
ANISOU  469  O   HOH E  89     3821   3777   4391    685   -505    500       O
